# Supplementary material for: High Frequencies of Functional Virus-Specific CD4+ T Cells in SARS-CoV-2 Subjects With Olfactory and Taste Disorders
Source: PubMed Central journal article supplement (PMC8631501; doi:10.3389/fimmu.2021.748881), 2021-11-10
Supplement: DataSheet_1.pdf [file DataSheet_1.pdf]

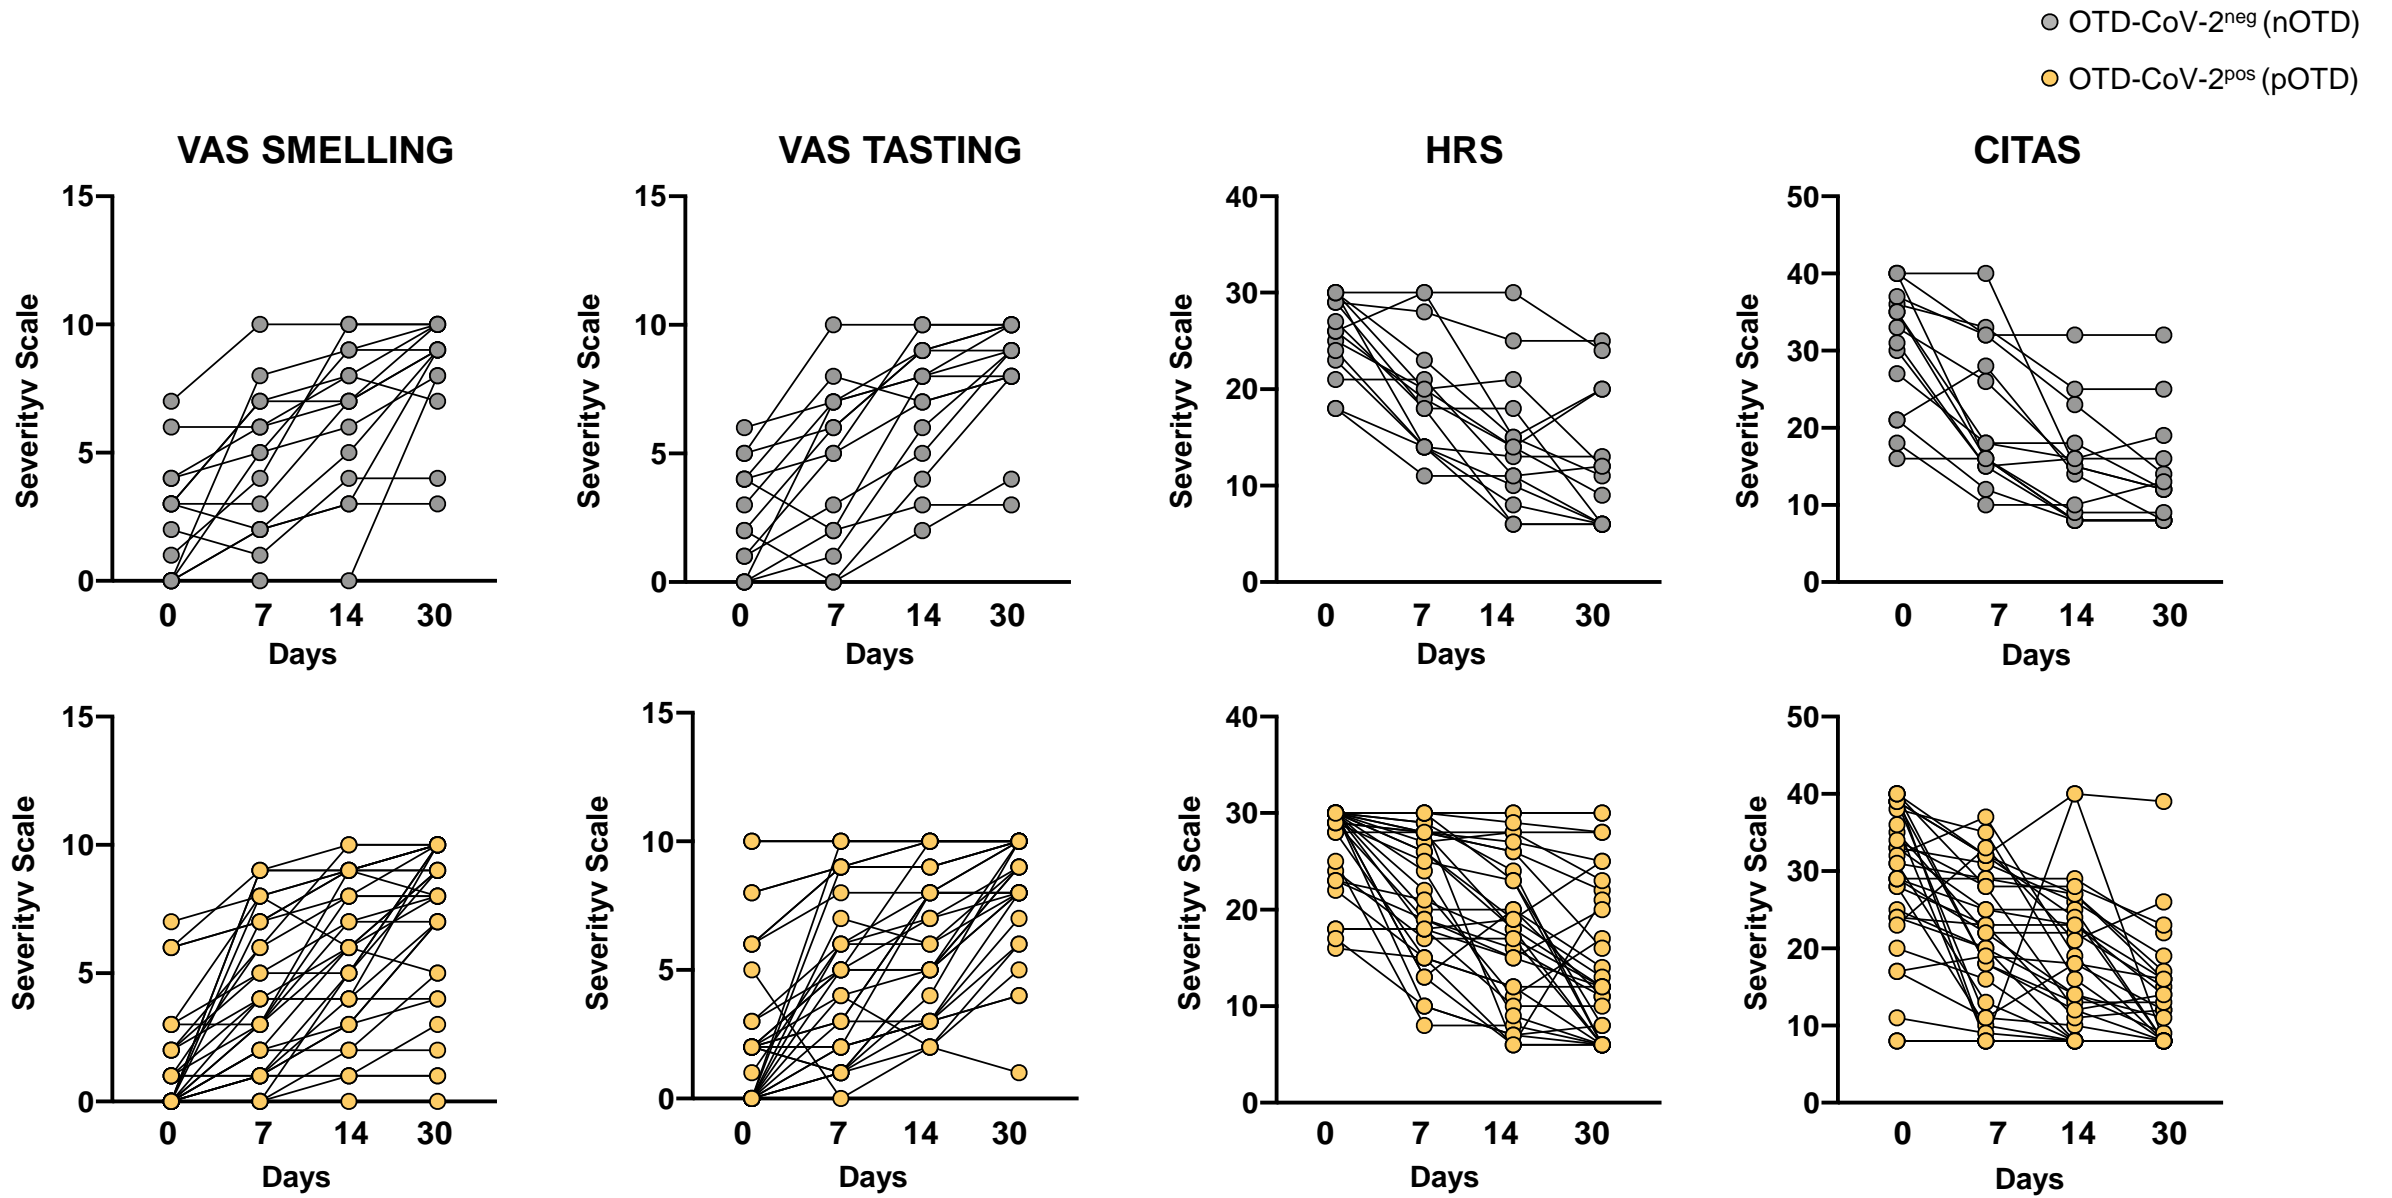

**Suppl. Fig.1** Loss of smell and taste severity scored according to Visual Analogue Scale (VAS), Hyposmia Rating Scale (HRS) and Chemotherapy Induced Taste Alteration Scale (CiTAS) in OTD-CoV-2<sup>neg</sup> and OTD-CoV-2<sup>pos</sup> subjects.
