# Supplementary material for: High Frequencies of Functional Virus-Specific CD4+ T Cells in SARS-CoV-2 Subjects With Olfactory and Taste Disorders
Source: PubMed Central journal article supplement (PMC8631501; doi:10.3389/fimmu.2021.748881), 2021-11-10

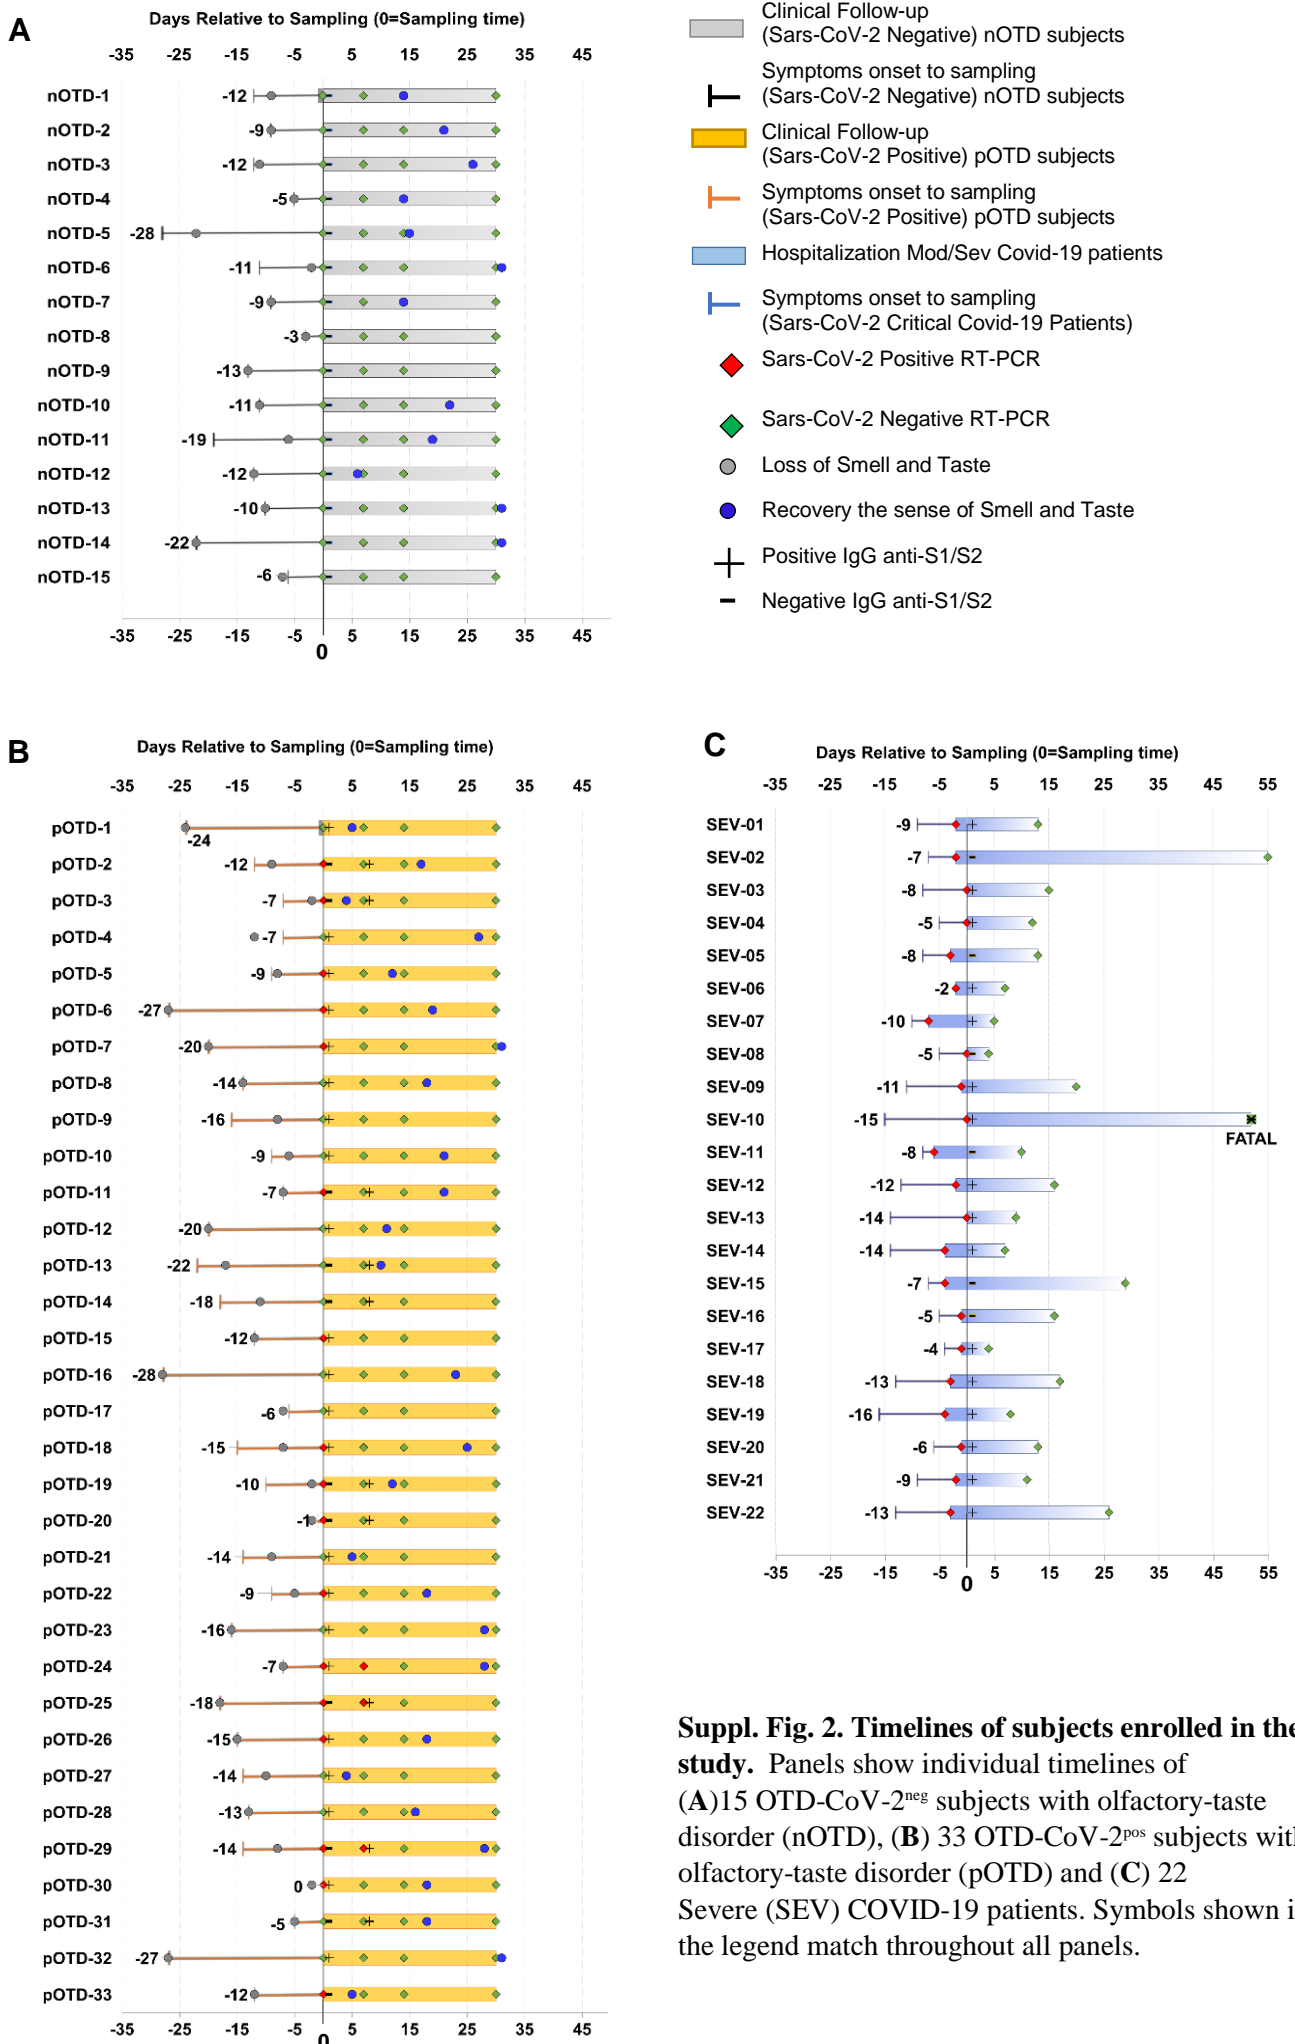

Supplement: DataSheet_2.pdf [file DataSheet_2.pdf]
