# Supplementary material for: High Frequencies of Functional Virus-Specific CD4+ T Cells in SARS-CoV-2 Subjects With Olfactory and Taste Disorders
Source: PubMed Central journal article supplement (PMC8631501; doi:10.3389/fimmu.2021.748881), 2021-11-10
Supplement: DataSheet_3.pdf [file DataSheet_3.pdf]

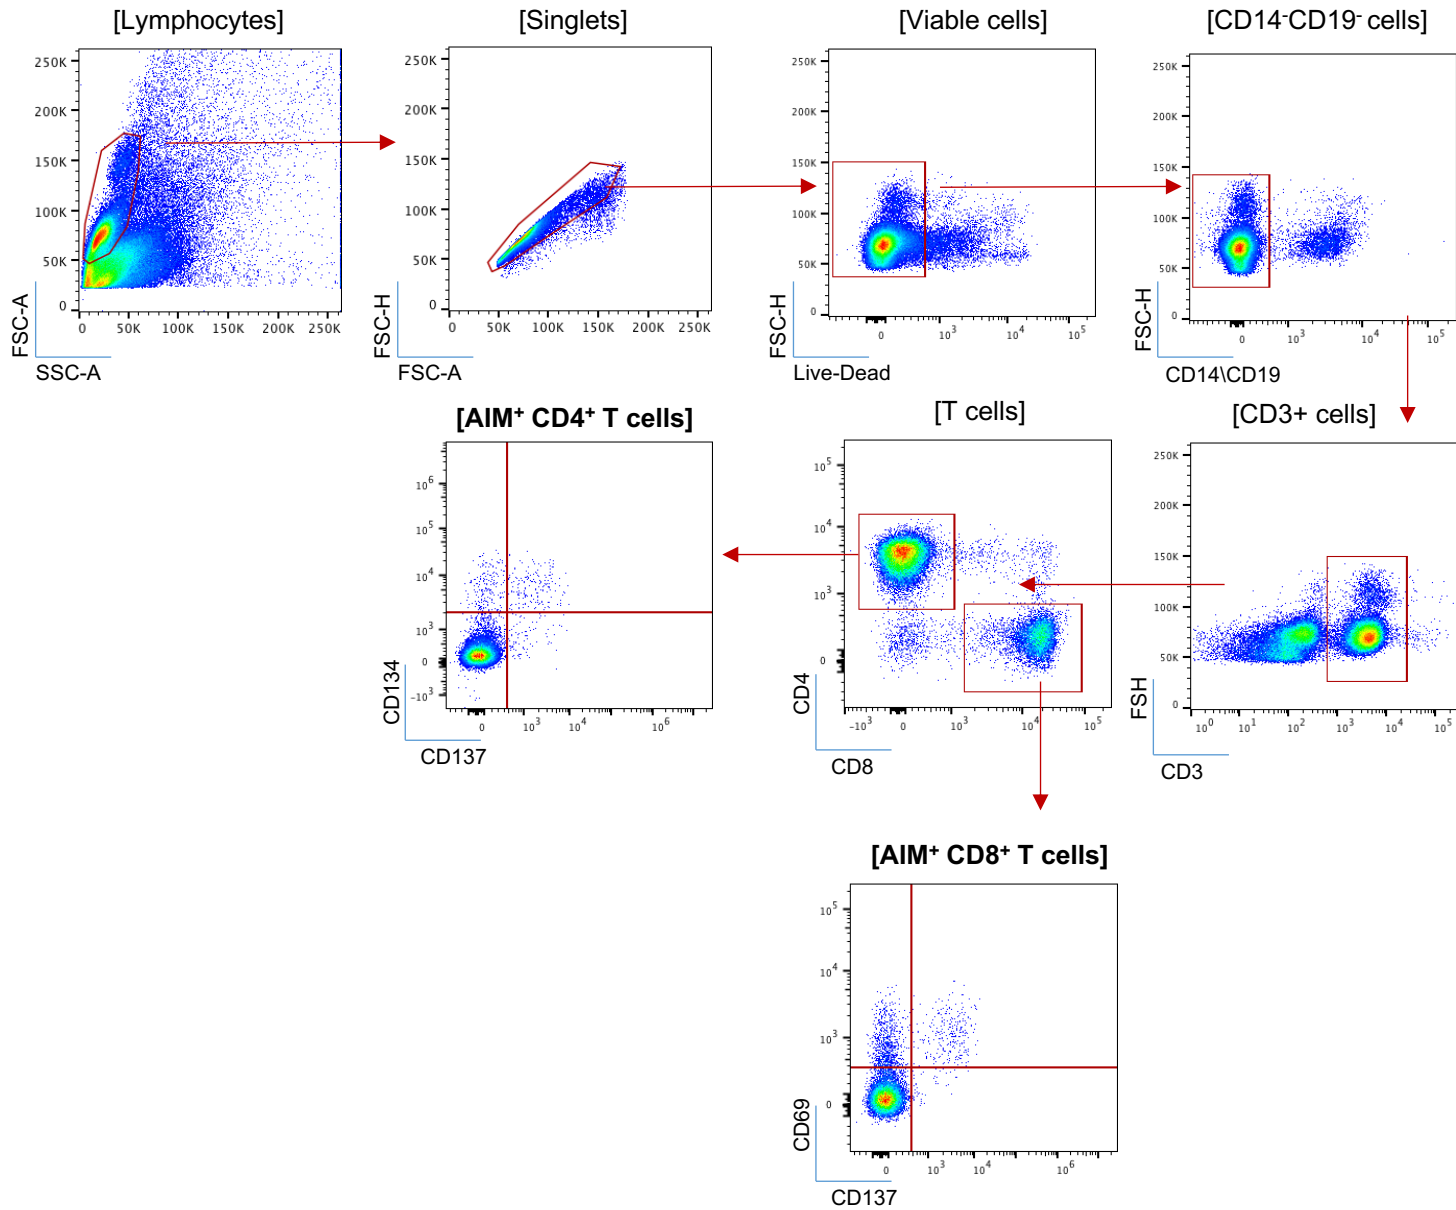

**Suppl. Fig. 3.** Gating strategy for identification of SARS-CoV-2 -specific CD4<sup>+</sup> (CD134<sup>+</sup>CD137<sup>+</sup>) and CD8 (CD69<sup>+</sup>CD137<sup>+</sup>) T cells.
