# Supplementary material for: High Frequencies of Functional Virus-Specific CD4+ T Cells in SARS-CoV-2 Subjects With Olfactory and Taste Disorders
Source: PubMed Central journal article supplement (PMC8631501; doi:10.3389/fimmu.2021.748881), 2021-11-10
Supplement: DataSheet_4.pdf [file DataSheet_4.pdf]

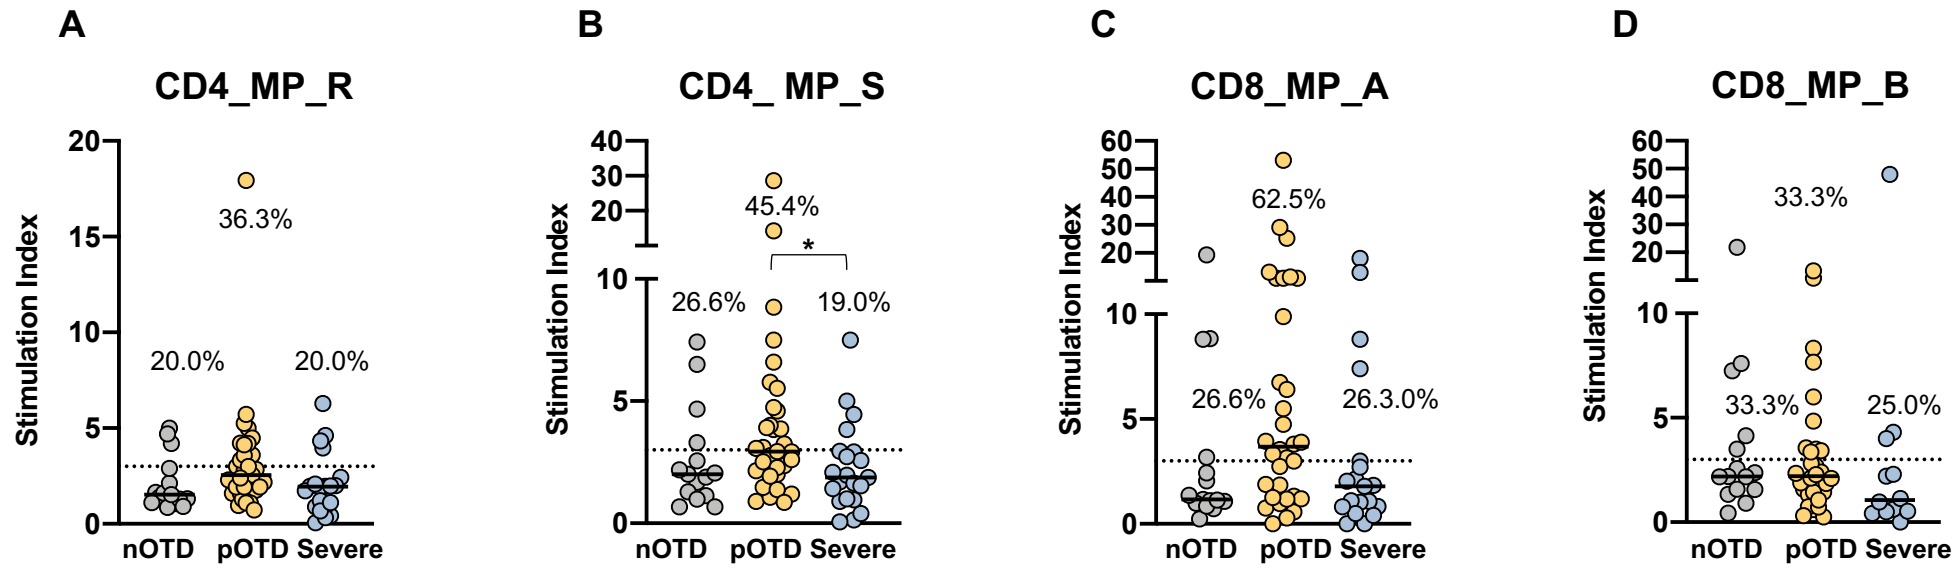

**Suppl. Fig. 4** Ratio of (A-B) MP-specific CD4<sup>+</sup> and (C-D) CD8<sup>+</sup> T-cell activation over negative control (DMSO) activation (SI, stimulation index) in the three groups of subjects. Dotted black line represents the cut-off of positivity (SI>3).
