# Supplementary material for: High Frequencies of Functional Virus-Specific CD4+ T Cells in SARS-CoV-2 Subjects With Olfactory and Taste Disorders
Source: PubMed Central journal article supplement (PMC8631501; doi:10.3389/fimmu.2021.748881), 2021-11-10
Supplement: DataSheet_6.pdf [file DataSheet_6.pdf]

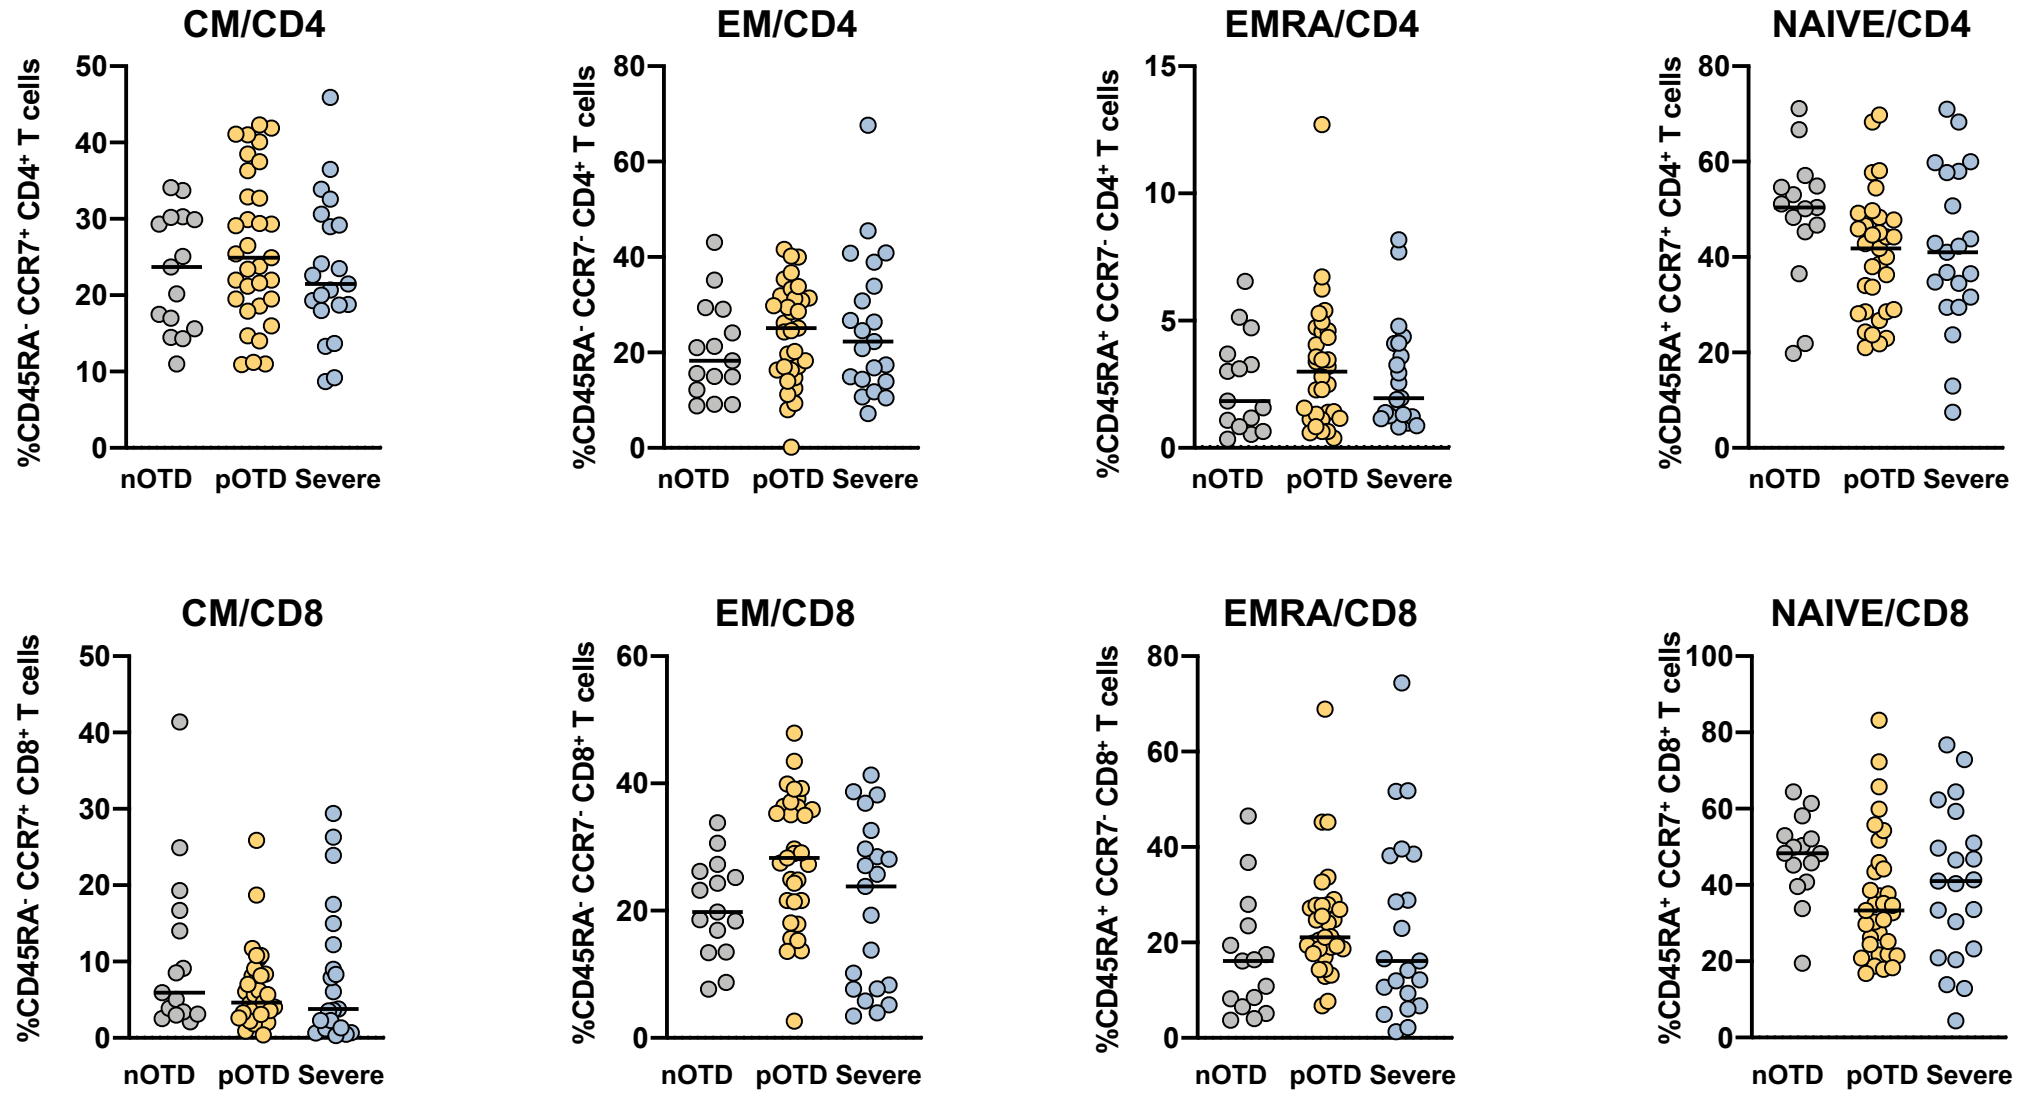

**Suppl. Fig. 6** Percentage of T-cell subsets central memory (CM), effector memory (EM), effector memory CD45RA+ (EMRA) and naïve calculated out of total CD4+ (upper panel) or total CD8+ T cells (bottom panel) are shown.
